# Supplementary material for: Genetic Variants of Retinoic Acid Receptor-Related Orphan Receptor Alpha Determine Susceptibility to Type 2 Diabetes Mellitus in Han Chinese
Source: PubMed Central journal article supplement (PMC4999842; doi:10.3390/genes7080054), 2016-08-20
Supplement: genes-07-00054-s001.pdf [file genes-07-00054-s001.pdf]

# Supplementary Materials: Genetic Variants of Retinoic Acid Receptor-Related Orphan Receptor Alpha Determine the Susceptibility to Type 2 Diabetes Mellitus in Han Chinese

Yuwei Zhang, Yulan Liu, Yin Liu, Yanjie Zhang and Zhiguang Su

**Table S1.** Nine single-nucleotide polymorphisms (SNPs) in the *RORA* gene in the study.

| SNPs       | Position<br>(GRCh38.p2) | Alleles | Primers (5'–3')                               |                                                  |
|------------|-------------------------|---------|-----------------------------------------------|--------------------------------------------------|
|            |                         |         | PCR                                           | SNaPshot                                         |
| rs17270188 | 60,507,710              | G/A     | GAAATGGTACCTATTTACAG<br>GACTTGAATTGTCCTTCCAG  | AATATTAGTTATTATTATACTTGAAGCATAA                  |
| rs1898413  | 60,528,610              | G/A     | GGATCCCTTACAGTGCTTAC<br>CATTACTAGGCAGACTTCTTG | CTACATAACACATTGCAAATGGTCACA                      |
| rs11638541 | 60,539,998              | T/C     | AGTTCTGGCAGCTAGAACAC<br>GCATTACTGACACTATCTGC  | ATGTCTTGCCATTAGAGATGAGACAAGGCAACACCATGCT         |
| rs8033552  | 60,551,386              | G/A     | TAACGTCCTTCCCTGTTGT<br>AGATGGCTCTTTGTACTCCC   | TGATTCTGATGCTTTGGCTCATCCTGGTCCCTGCTC             |
| rs10851685 | 60,563,001              | A/T     | TTTACTGCCAGTGAGAACCA<br>TGTCCTGATGAGACCAAAAAG | GAATGATCCACACTCTCATCTAGTTGCTTTTA                 |
| rs8041381  | 60,570,763              | A/G     | TAGCAACGTCACCACATCGT<br>TACCACCACTTCACAGAGGT  | GATACTTGGCCTTCATGATACGGAG                        |
| rs340002   | 60,580,912              | G/A     | GGTGGAGTAAGCTGTGATC<br>TACAGAAAATGTGGGTGC     | GAGCTGTCAGTCATTTCTTACATCTGAACAACCATGTTTCTTTACAGC |
| rs340023   | 60,615,883              | T/C     | CATGGCAACCAGTTCTTCAG<br>GAGGAACTAAATTCAGCACC  | GTTGAGAGGGCTGCTTCGAAAATAACTCTG                   |
| rs28724570 | 60,625,076              | T/C     | CAGATAGACTTAGGTGTAGG<br>TAAGCCACAGAAGGTCAG    | ATATTCAAATAATGATAGGGCATACTTTTATTTCATTGTTTCATC    |
